# Supplementary material for: Activity Monitors as Support for Older Persons’ Physical Activity in Daily Life: Qualitative Study of the Users’ Experiences
Source: PubMed Central journal article supplement (PMC5814603; doi:10.2196/mhealth.8345), 2018-02-01
Supplement: mhealth_v6i2e34_app2.pdf [file mhealth_v6i2e34_app2.pdf]

## Multimedia Appendix 2 Main – and subcategories based on the interviews

| <b>Main category</b>                         | <b>Adherent sub-categories</b> |
|----------------------------------------------|--------------------------------|
| Influence on the individual                  | Motivation                     |
|                                              | Emotions                       |
|                                              | Awareness                      |
|                                              | Behavior                       |
| Experiences from being monitored             | Limitations                    |
|                                              | Possibilities                  |
|                                              | Integrity                      |
|                                              | Reliability                    |
|                                              | Feedback                       |
| Experiences from using the technical devices | Handling                       |
|                                              | Learning                       |
|                                              | Insecurity                     |
|                                              | Wearing the monitors           |
